# Supplementary material for: CommonMind Consortium provides transcriptomic and epigenomic data for Schizophrenia and Bipolar Disorder
Source: PubMed Central journal article supplement (PMC6760149; doi:10.1038/s41597-019-0183-6), 2019-09-24
Supplement: 41597_2019_183_MOESM1_ESM.pdf [file 41597_2019_183_MOESM1_ESM.pdf]

# CommonMind Consortium

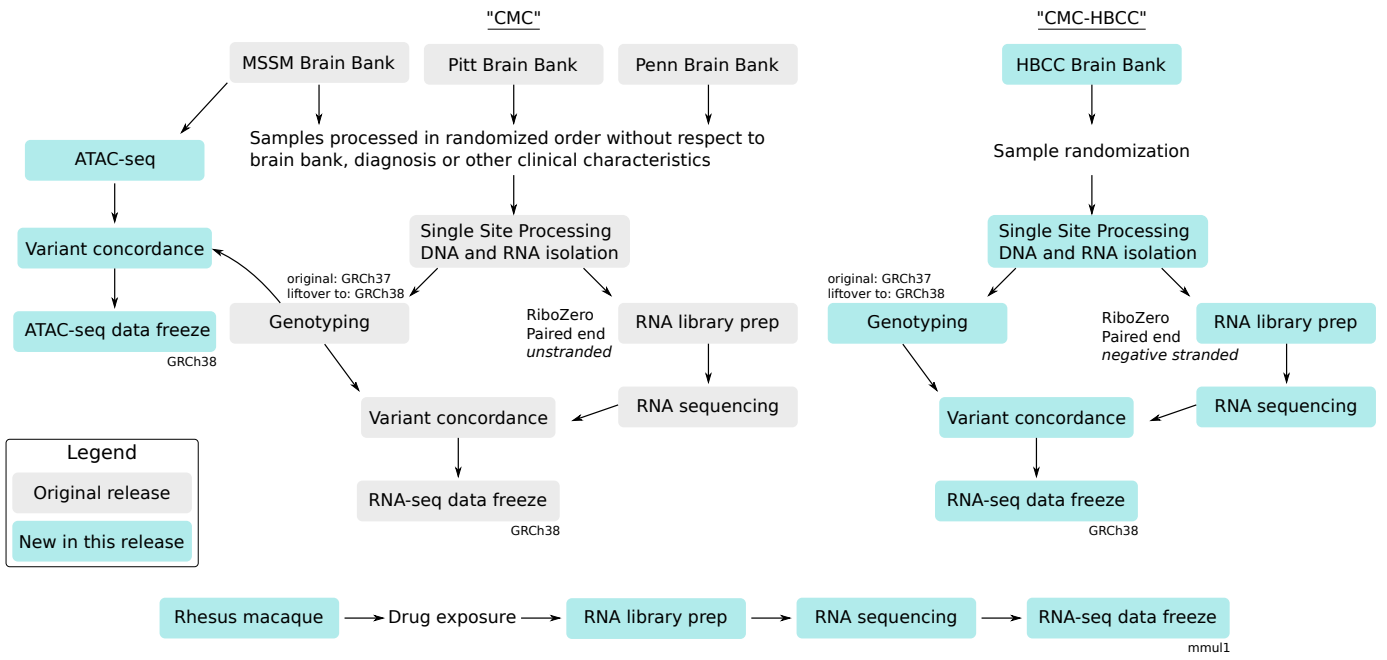

**Supplementary Figure 1: Experimental workflow for four brain banks.** Steps included in original release are shown in grey, steps new to the current release are shown in teal.

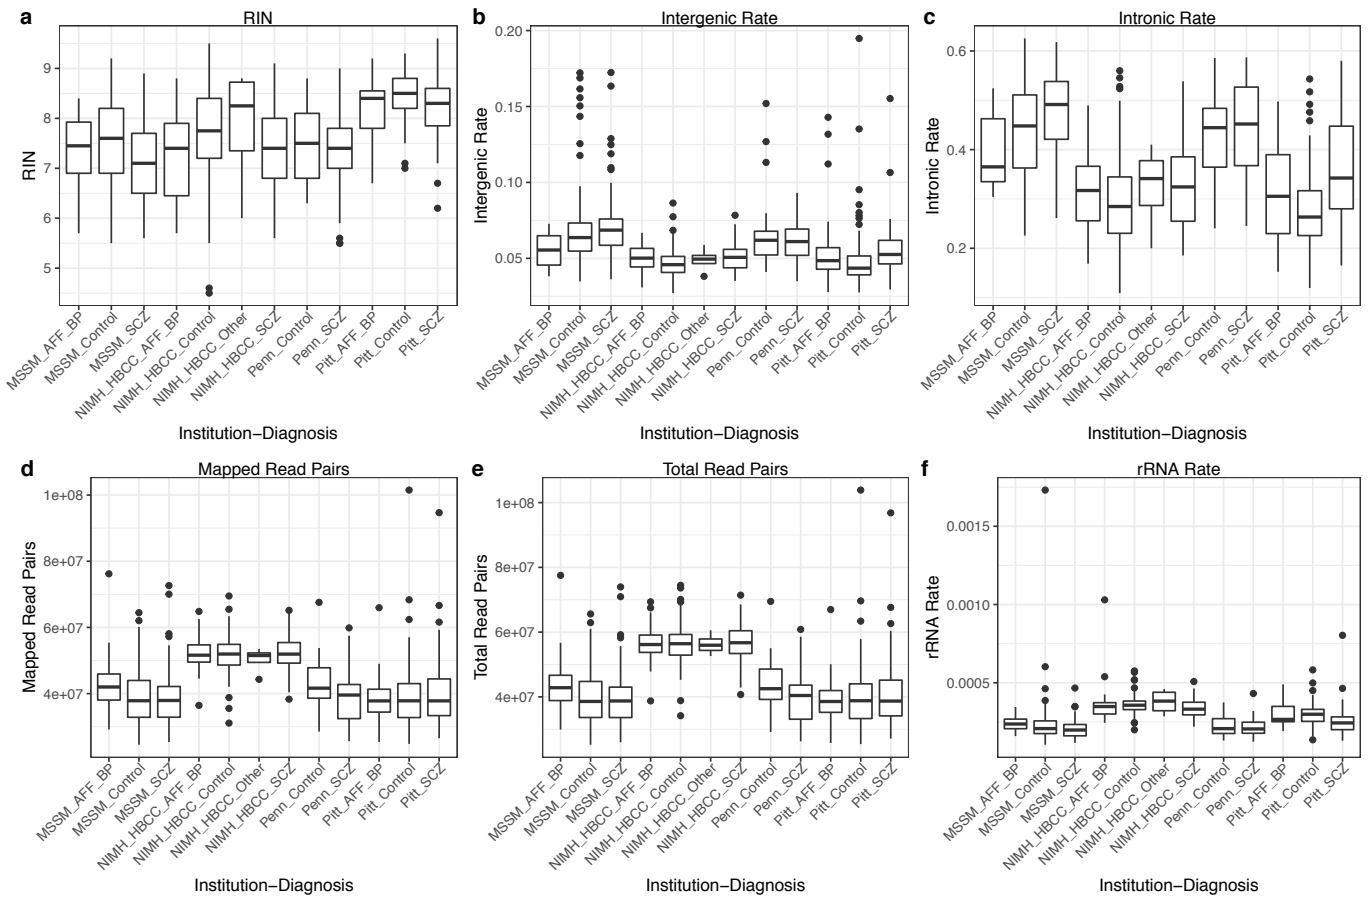

**Supplementary Figure 2: RNA-seq quality control metrics stratified by brain bank and disease status.** All samples from the 4 brain banks are shown.
